# Supplementary material for: Improved control of SARS-CoV-2 by treatment with a nucleocapsid-specific monoclonal antibody
Source: PubMed Central journal article supplement (PMC9711872; doi:10.1172/jci162282), 2022-12-01
Supplement: jci-132-162282-s074.pdf [file jci-132-162282-s074.pdf]

## **Improved control of SARS-CoV-2 by treatment with nucleocapsid-specific monoclonal antibody**

Tanushree Dangi<sup>1</sup>, Sarah Sanchez<sup>1</sup>, Jacob Class<sup>2</sup>, Michelle Richner<sup>2</sup>, Lavanya Visvabharathy<sup>3</sup>, Young Rock Chung<sup>1</sup>, Kirsten Bentley<sup>4</sup>, Richard J. Stanton<sup>4</sup>, Igor J. Koralnik<sup>3</sup>, Justin M. Richner<sup>\*2</sup>, Pablo Penaloza-MacMaster<sup>\*1</sup>

<sup>1</sup>Department of Microbiology and Immunology, Northwestern University Feinberg School of Medicine, Chicago, IL 60611. <sup>2</sup>Department of Microbiology & Immunology, University of Illinois at Chicago College of Medicine, Chicago, IL 60612. <sup>3</sup>Ken and Ruth Davee Department of Neurology, Feinberg School of Medicine, Northwestern University, Chicago, Illinois, USA. <sup>4</sup>Division of Infection and Immunity, School of Medicine, Cardiff University, Cardiff, United Kingdom.

### **\*Correspondence and Lead contacts:**

Justin Richner ([richner@uic.edu](mailto:richner@uic.edu)) & Pablo Penaloza-MacMaster  
([ppm@northwestern.edu](mailto:ppm@northwestern.edu))

## Supplemental Figures:

### Figure S1

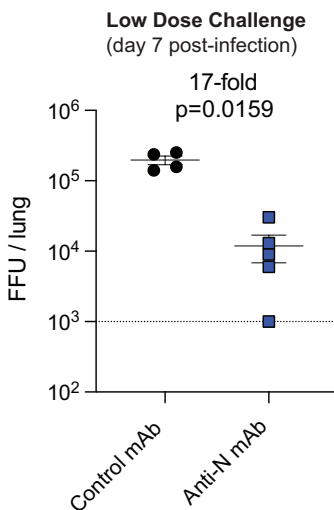

**Figure S1. Nucleocapsid-specific monoclonal antibody (mAb) improves the control of SARS-CoV-2 infection.** Viral loads in lungs by focus forming assays. These data are from the same mice from Figure 6A-6C, except that viral loads in lungs were quantified by focus forming assays. Challenges were performed with a total of 4-5 mice per group in Biosafety level 3 (BSL-3) facilities. Indicated P-values were calculated using Mann Whitney test.

## Figure S2

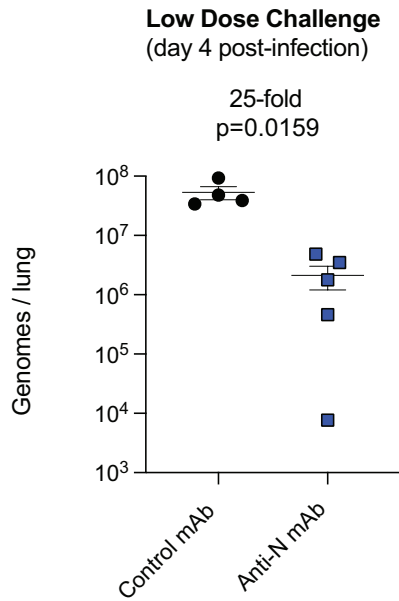

**Figure S2. Nucleocapsid-specific monoclonal antibody (mAb) improves the acute control of SARS-CoV-2 infection.** Viral loads in lungs by RT-qPCR. Experiment was identical to that of Figure 6A, except that mice were euthanized after 4 days. Challenges were performed with a total of 4-5 mice per group in Biosafety level 3 (BSL-3) facilities. Indicated P-values were calculated using Mann Whitney test.

## Figure S3

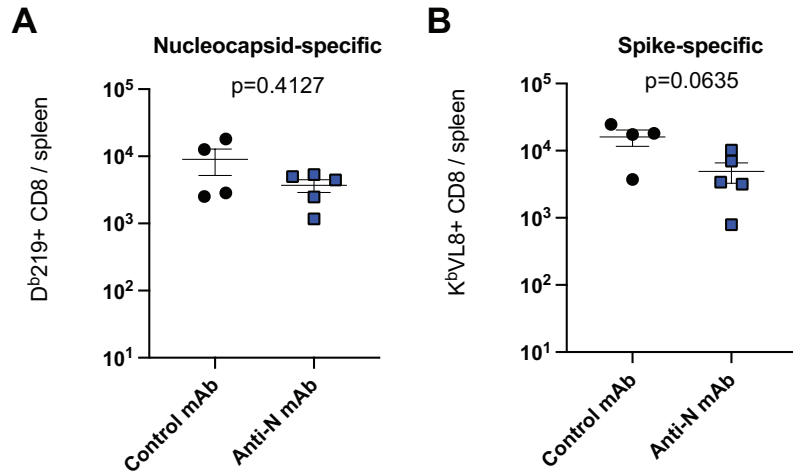

**Figure S3. Nucleocapsid-specific monoclonal antibody (mAb) does not significantly affect virus-specific CD8 T cell responses. (A)** Numbers of SARS-CoV-2 nucleocapsid-specific CD8 T cells. **(B)** Numbers of SARS-CoV-2 spike-specific CD8 T cells. These data are from the same mice from Figure 6A-6C. Data are from spleen at day 7 post-infection. Challenges were performed with a total of 4-5 mice per group in Biosafety level 3 (BSL-3) facilities. Indicated P-values were calculated using Mann Whitney test.
